# Supplementary material
Source: ML conference proceedings conference paper supplement (https://proceedings.neurips.cc/paper_files/paper/2010/hash/287e03db1d99e0ec2edb90d079e142f3-Abstract.html)

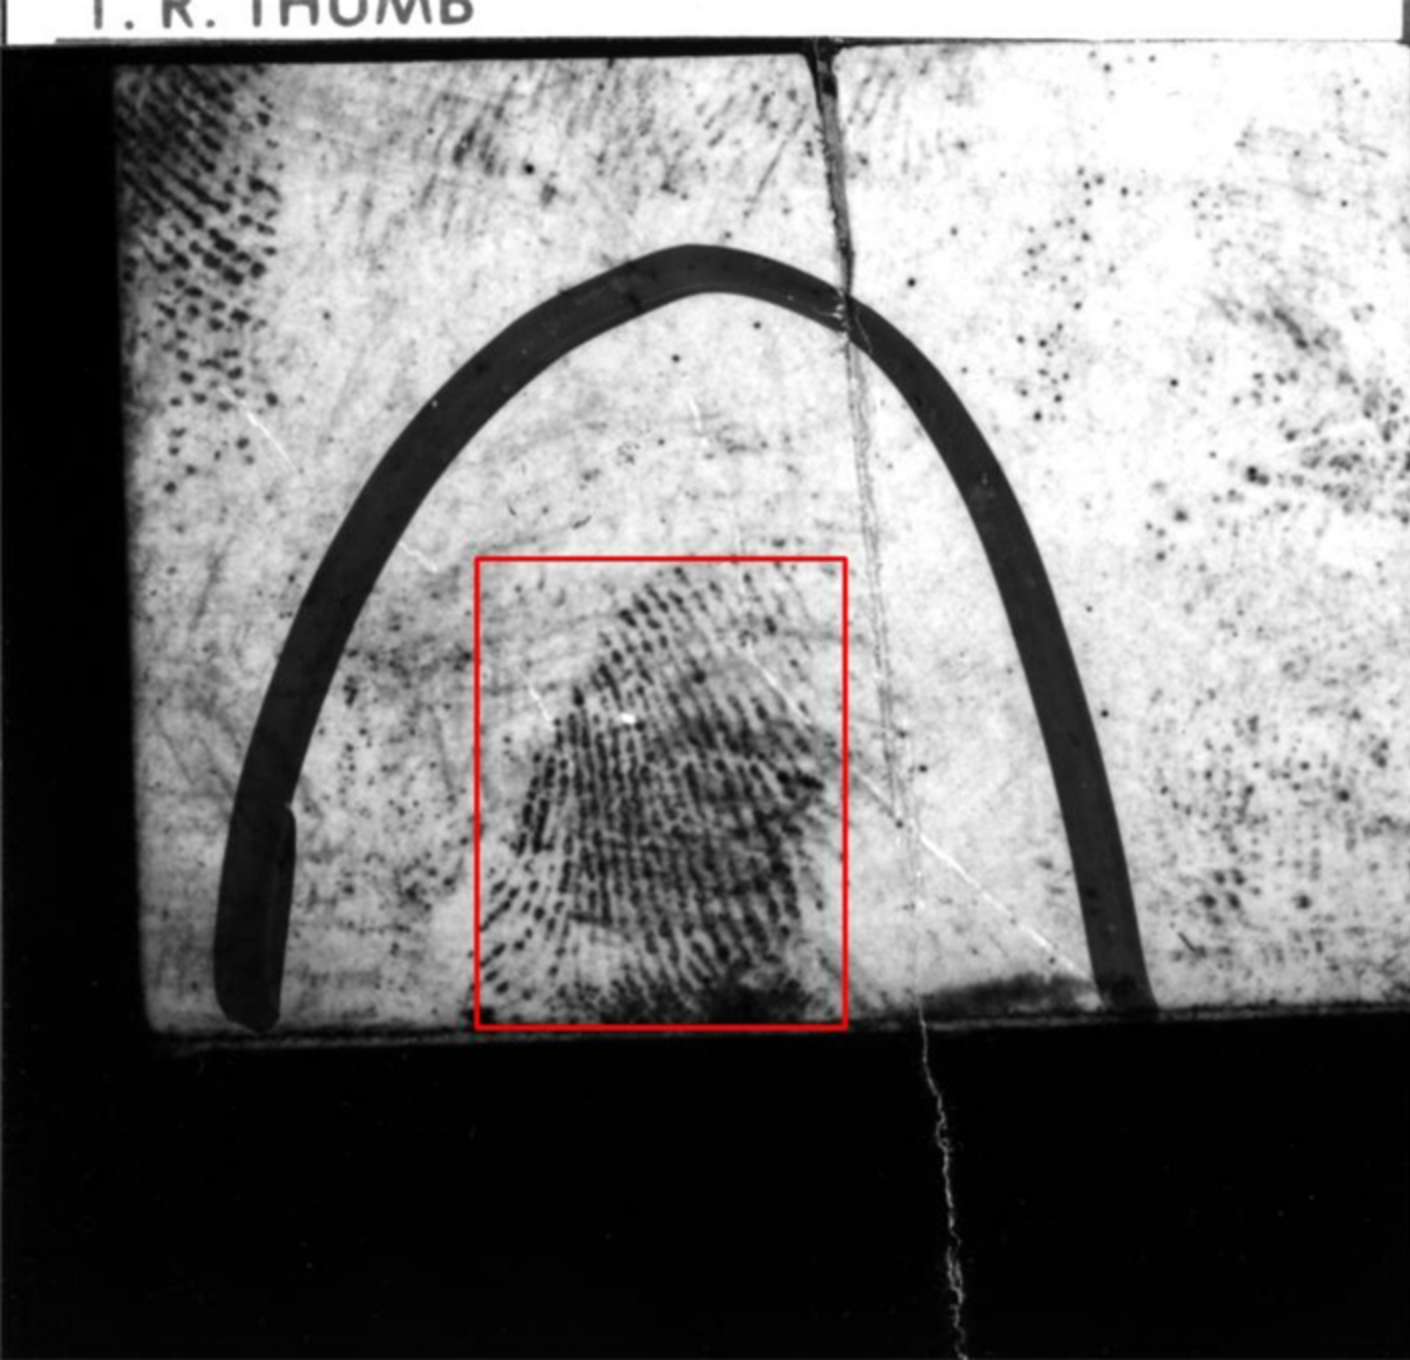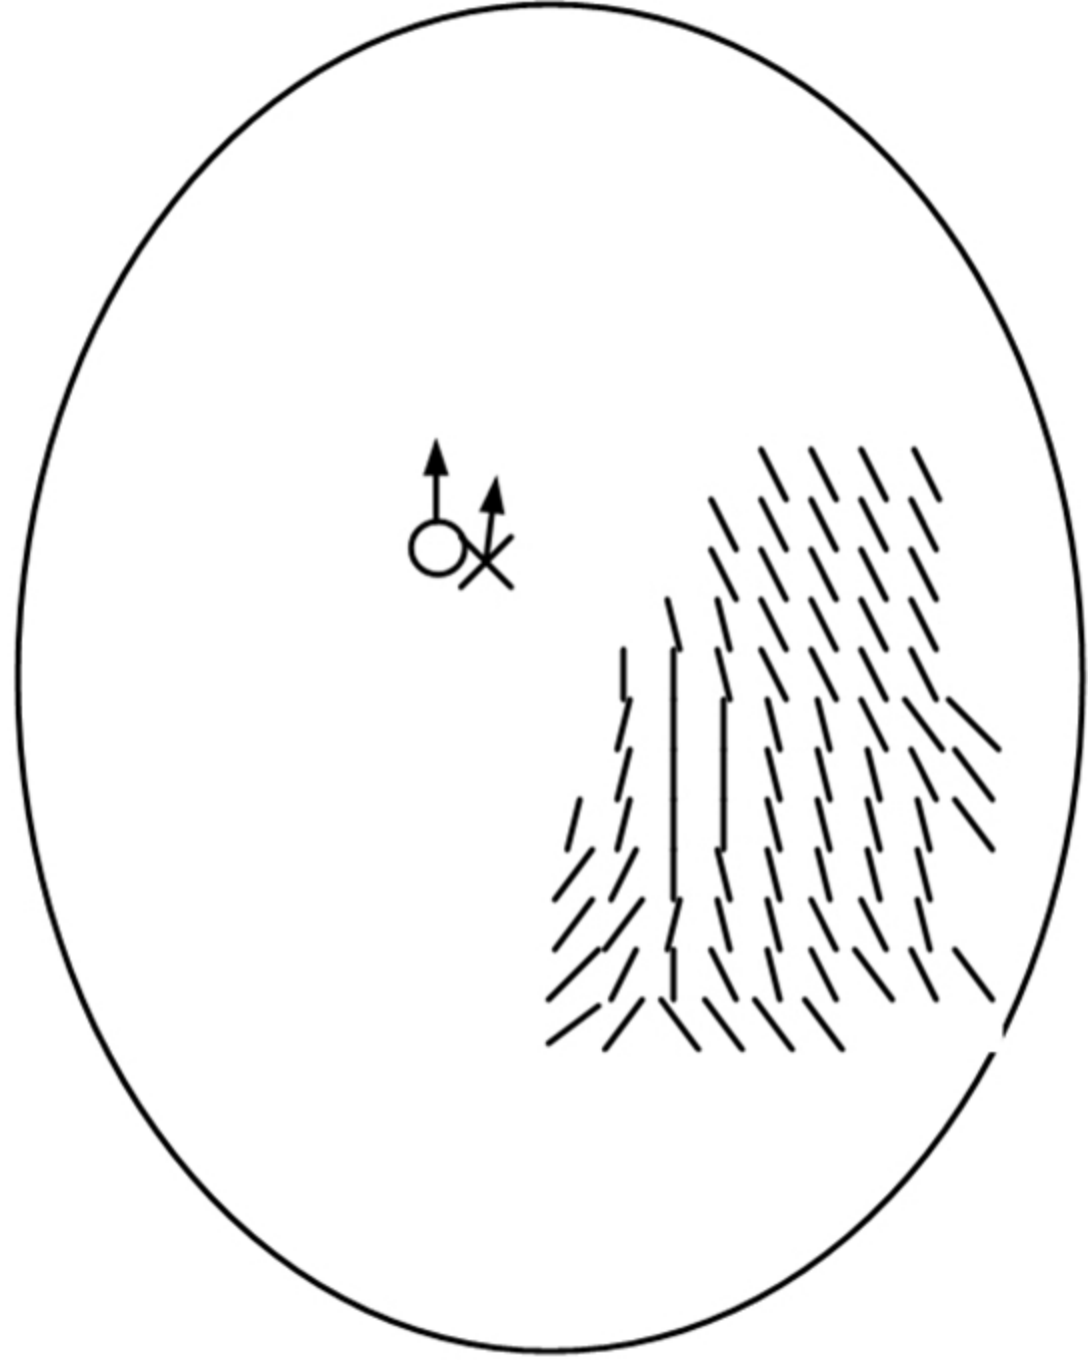

Supplement: Supplementary file [file 287e03db1d99e0ec2edb90d079e142f3-Supplemental.zip]
